# Supplementary material
Source: PubMed Central journal article supplement (PMC4502390)
Supplement: NIHMS64050-supplement-1.pdf [file NIHMS64050-supplement-1.pdf]

## Supplementary Materials

### Materials and methods

**Table 1. Primer Sequences**

| <b>Primer sequence 5'-3'</b> | <b>Name by family alignment</b> | <b>Final Conc. In <math>\mu</math>M</b> |
|------------------------------|---------------------------------|-----------------------------------------|
| GARGATRTCCTGYAAGGCTTC        | IGHV1                           | 1.8                                     |
| GAAKVAGTCAGGACCTRRCT         | IGHV2                           | 4.8                                     |
| CTGGAGGTGGCCTGGTGCAGCC       | IGHV4                           | 0.2                                     |
| AGCCTGGAGGGTCCCTGAA          | IGHV5                           | 0.2                                     |
| GWGWCWGGAGGAGGCTTRGT         | IGHV6                           | 3.6                                     |
| TCTGRAGGAGGCTTGGTACAG        | IGHV7                           | 0.4                                     |
| SAGTCTGGCCCTGGKATAKTGC       | IGHV8                           | 1.68                                    |
| ACAGATCCAGTTGGTGCAGT         | IGHV9                           | 0.2                                     |
| CTGGTGGAGGATTGGTGCAGC        | IGHV10                          | 0.2                                     |
| GTGCAGCTGTTGGAGACTGGAG       | IGHV11                          | 0.2                                     |
| CAGATKAGCTTMAGGAGTC          | IGHV12                          | 0.2                                     |
| AGGTRCAGCTKGTAGAGACMG        | IGHV13                          | 0.2                                     |
| GAGGTTCACTGCAGCAGT           | IGHV14                          | 0.2                                     |
| CAGGTTACCTACAACAG            | IGHV15                          | 0.2                                     |
| GTGAGGTGCAGCTGGTGGGA         | IGHV16                          | 0.2                                     |

| <b>Primer sequence 5'-3'</b> | <b>Name by family alignment</b> | <b>Final Conc. in <math>\mu</math>M</b> |
|------------------------------|---------------------------------|-----------------------------------------|
| GTGATGTTGTGATGACCCARACTCC    | IGKV1.1                         | 0.4                                     |
| CWGTCACTYYTGARMRTCAG         | IGKV2                           | 6                                       |
| TKSTCTGGGTTCCAGGTRAG         | IGKV3                           | 1.6                                     |
| AWTGTKCTCACCCAGTCTCC         | IGKV4.1                         | 0.8                                     |
| CCACASAARCTCAGGGAAAR         | IGKV5                           | 1.6                                     |
| RYATTGTRATGACCCARWCTC        | IGKV6.1                         | 6                                       |
| GGTYACTATSAGCTGYAART         | IGKV8                           | 1.6                                     |
| CCAGATGTGACATCCAGATG         | IGKV9                           | 0.2                                     |
| GATATCCAGATGACACAGACTAC      | IGKV10.1                        | 0.2                                     |
| ATGTGACATYCAGATGACCC         | IGKV12                          | 0.4                                     |
| GACATCCAGATGACACAATCTTC      | IGKV13.1                        | 0.2                                     |
| CAGGACTCAGCATGGACATGA        | IGKV14.1                        | 0.2                                     |
| GAAACAACACTGTGACCCAGTCTCC    | IGKV17                          | 0.2                                     |

  

| <b>Primer sequence 5'-3'</b> | <b>Name</b> | <b>Final Conc. in <math>\mu</math>M</b> |
|------------------------------|-------------|-----------------------------------------|
| TGACAGATGGGGSTGTYGTTTTGGC    | Mouse JH1   | 1                                       |
| TGACAGATGGGGCTGTTGTTGT       | Mouse JH2   | 1                                       |
| TGACATTTGGGAAGGACTGACTCTC    | Mouse JH3   | 1                                       |
| TTTKATTTCCAGYTTGGTCCC        | Mouse JK1   | 1                                       |
| TTTTATTTCCAACCTTTGTCCC       | Mouse JK2   | 1                                       |
| TTTCAGCTCCAGCTTGGTCCC        | Mouse JK3   | 1                                       |

**Table 1: Primer sequences and final concentration used for Immunoglobulin heavy and light chain PCR.**

PCR was performed from amplified cDNA templates from RNA extracted from sorted B cells from the spleens of immunised animals. Forward primers for heavy and light chain amplification were designed by family specific alignment of the functional primers from IMGT [18]. Reverse primers were modified from [19]

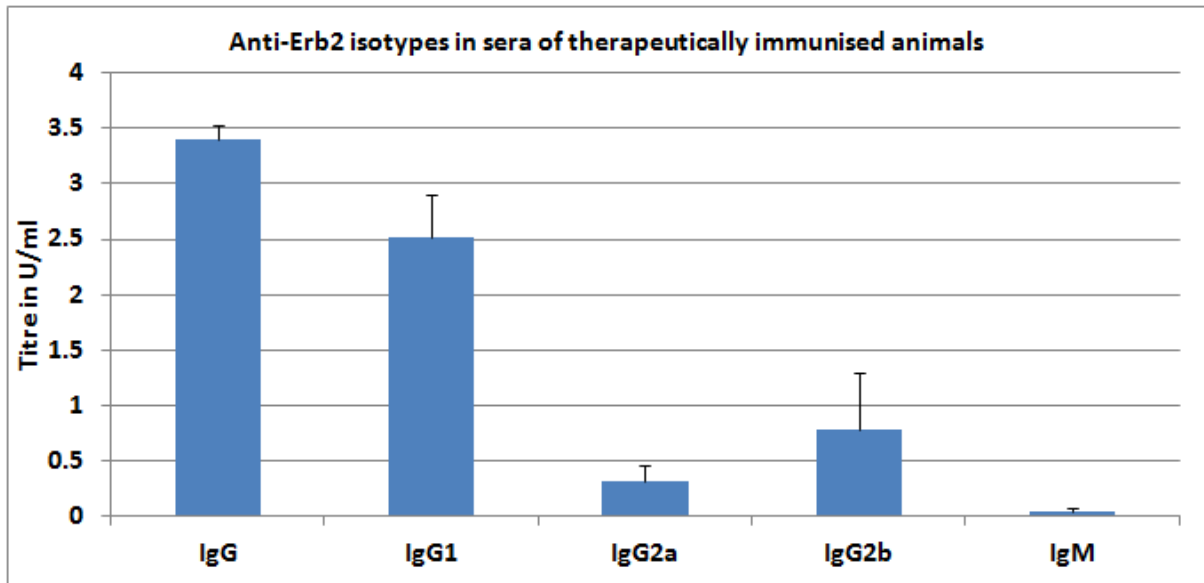

Figure S1. **Anti-ErbB2 antibody titre and isotype in animals immunised therapeutically with ErbB2-P30.** Groups of animals were immunised with ErbB-2-P30 as soon as they had measurable tumours (average 2.5 mm). All of the ErbB2-P30 immunised animals showed high titres of anti-ErbB2. IgG1 was significantly higher ( $p < .005$ ) compared with IgG2a at the age of 16 weeks, similar to the isotype profile of prophylactically immunised mice.
